# Supplementary material
Source: publisher figshare collection journal article supplement (https://karger.figshare.com/articles/dataset/_/6741173)
Supplement: Supplementary file 1 [file 1]

Archive with 2 entries (2 files):
- 490345sm_1.pdf
- ~$terial and Methods lalalal.docx
